# Supplementary material for: Identification of a novel gene signature for the prediction of recurrence in HCC patients by machine learning of genome-wide databases
Source: PubMed Central journal article supplement (PMC7064516; doi:10.1038/s41598-020-61298-3), 2020-03-10
Supplement: 41598_2020_61298_MOESM1_ESM.pdf [file 41598_2020_61298_MOESM1_ESM.pdf]

**Identification of a novel gene signature for the prediction of recurrence in HCC patients by machine learning of genome-wide databases**

Jie Shen<sup>1#</sup>, Liang Qi<sup>1#</sup>, Zhengyun Zou<sup>1#</sup>, Juan Du<sup>1</sup>, Weiwei Kong<sup>1</sup>, Lianjun Zhao<sup>1</sup>, Jia Wei<sup>1</sup>, Ling Lin<sup>2</sup>, Min Ren<sup>2</sup>, Baorui Liu<sup>1\*</sup>

<sup>1</sup> *Comprehensive Cancer Centre of Drum Tower Hospital, Medical School of Nanjing University, Clinical Cancer Institute of Nanjing University, Nanjing 210008, Jiangsu Province, China*

<sup>2</sup> *Shanghai Biotecan Pharmaceuticals Co., Ltd., Pudong New District, Shanghai, China*

# These authors contributed equally to this work.

**\*Correspondence to:** Bao-rui Liu, MD, Ph. D, Comprehensive Cancer Centre of Drum Tower Hospital, Medical School of Nanjing University, Clinical Cancer Institute of Nanjing University, 321 Zhongshan Road, Nanjing 210008, Jiangsu Province, China.

**Email:** baoruiliu@nju.edu.cn

**Tel.:** +86-25-83106666-61331

**Fax:** +86-25-83105082

**Figure S1.A:** DNAH5 mutation and DFS in TCGA database; **B:** DNAH5 mutation and DFS in AMC; **C:** ERBB4 mutation and DFS in TCGA database; **D:** ERBB4 mutation and DFS in AMC; **E:** ABCA12 mutation and DFS in TCGA database; **F:** ABCA12 mutation and DFS in AMC; **G:** ROBO2 mutation and DFS in TCGA database; **H:** ROBO2 mutation and DFS in AMC.

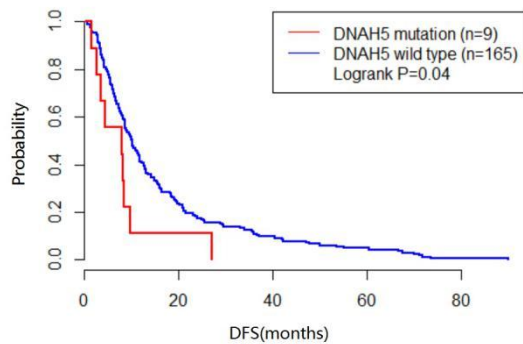

A

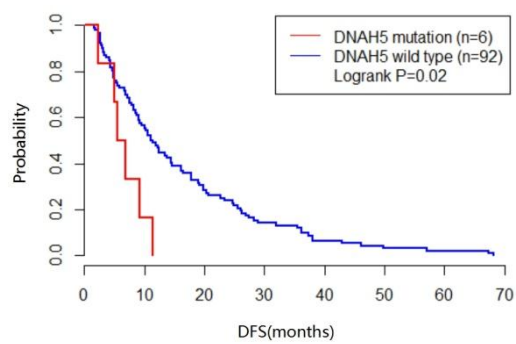

B

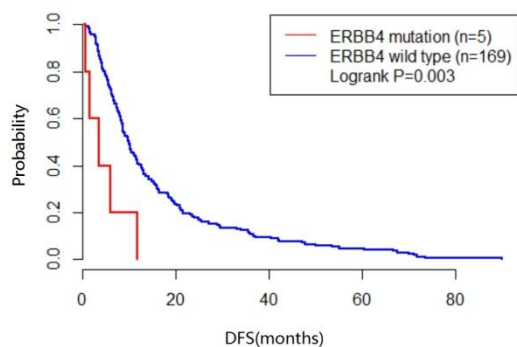

C

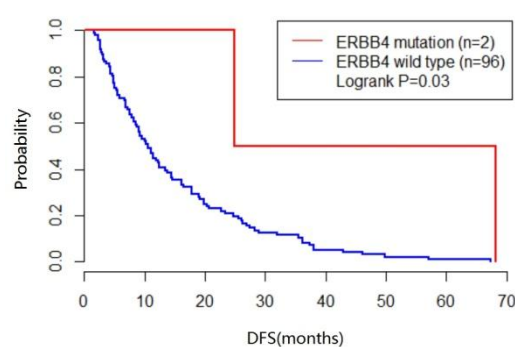

D

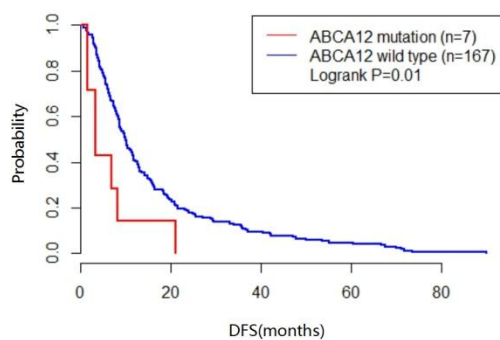

E

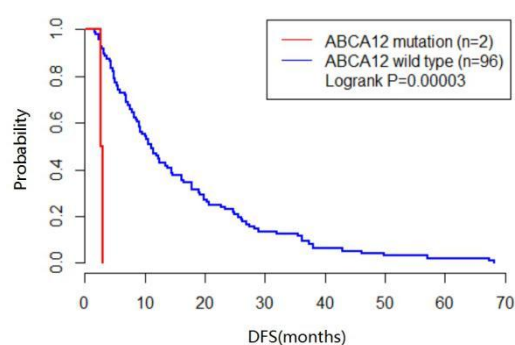

F

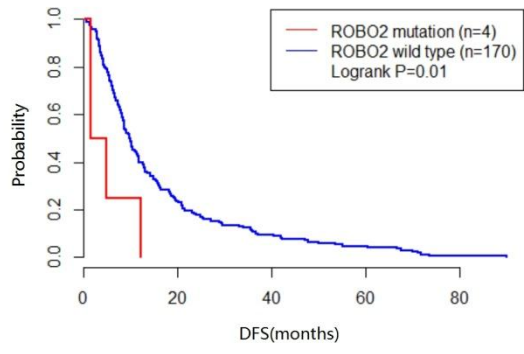

G

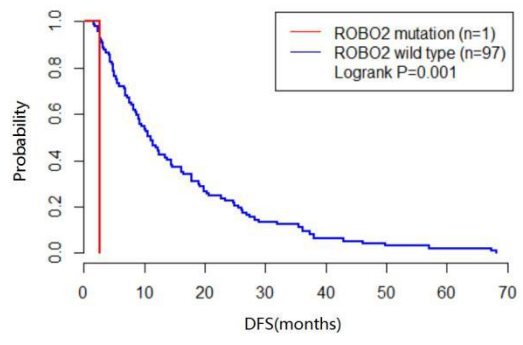

H

**Figure S2.** The data of HCC patients listed in the TCGA database and those included in our study. The original data downloaded from <http://www.cbioportal.org>.

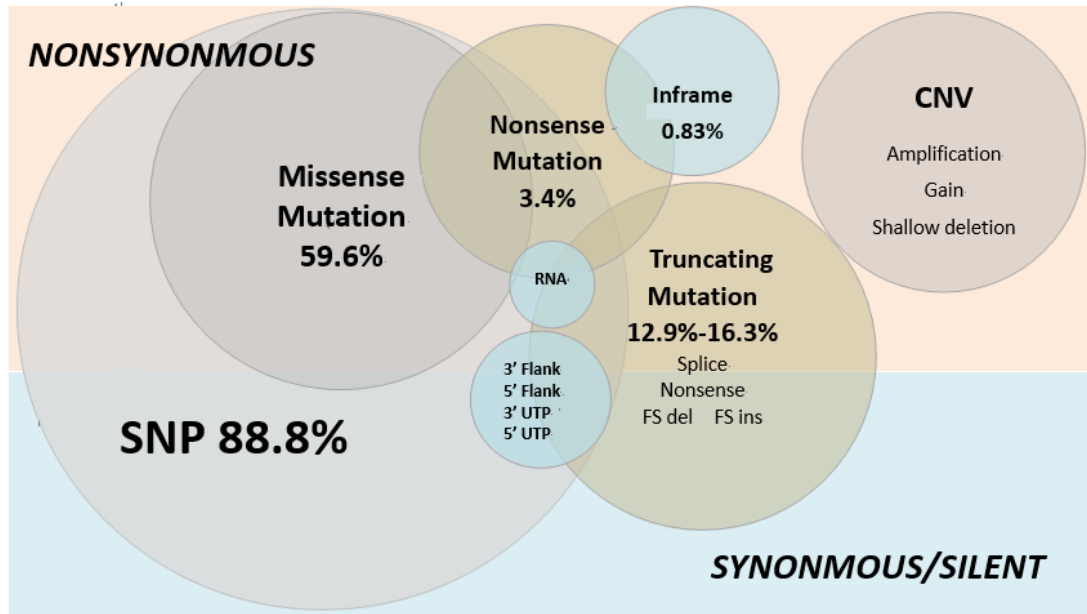

**Figure S3.** Pathological HE staining of 10 HCC patients. A: Patient1 (HE, 2,025X), B: Patient2 (HE, 1,214X), C: Patient3 (HE, 1,854X), D: Patient4 (HE, 1,744X), E: Patient5 (HE, 1,755X), F: Patient6 (HE, 1,143X), G: Patient7 (HE, 1,318X), H: Patient8 (HE, 2,347X), I: Patient9 (HE, 1,934X), J: Patient10 (HE, 2,157X).

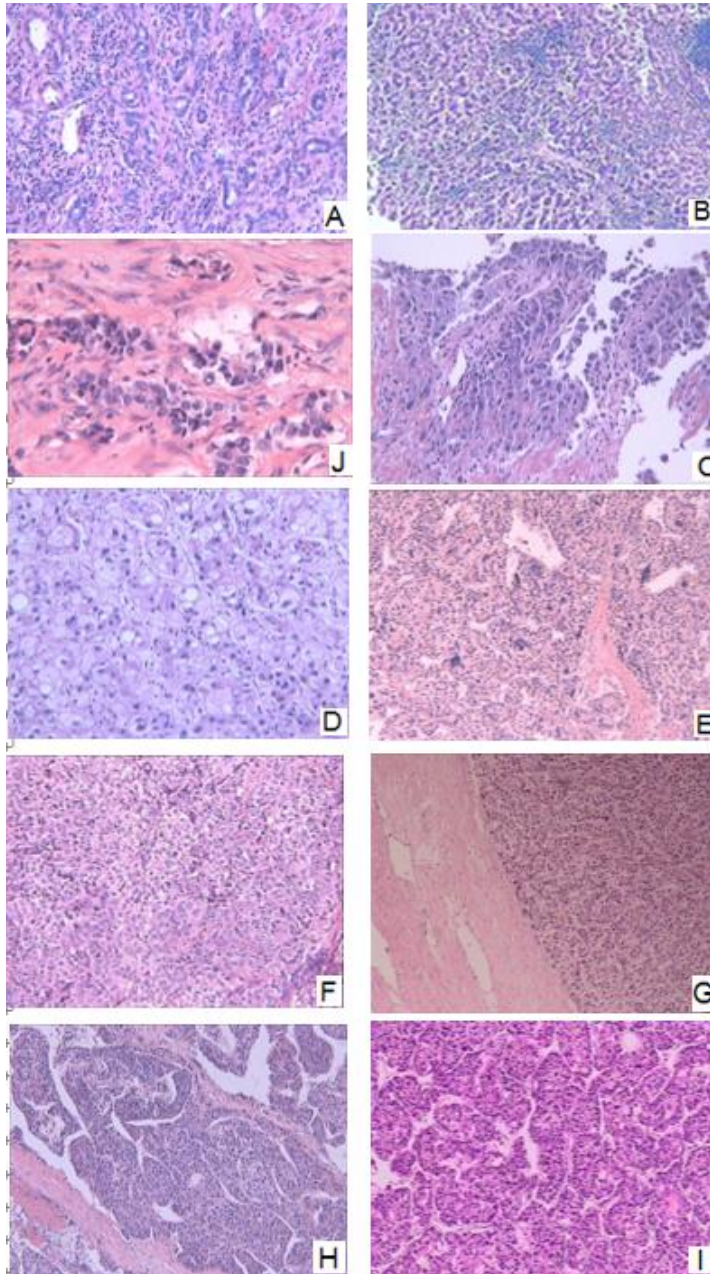

**TableS1.** The list of the 127 genes from TCGA database

---

| 127 Genes |        |         |         |          |        |        |       |
|-----------|--------|---------|---------|----------|--------|--------|-------|
| TTN       | ALMS1  | KMT2D   | PKHD1L1 | DMD      | SVEP1  | MT-ND6 | ROBO2 |
| TP53      | HMCN1  | SYNE1   | FREM2   | MT-CO1   | HERC1  | NEFH   |       |
| CTNNB1    | FRAS1  | DSPP    | MYO3A   | KEAP1    | LRP2   | NFE2L2 |       |
| MUC16     | USH2A  | BAP1    | DNAH5   | GCN1     | FBN1   | SPEG   |       |
| ALB       | MUC4   | FAT4    | DYNC2H1 | HTT      | PKHD1  | FANCM  |       |
| PCLO      | FLG    | CUBN    | DOCK2   | KIAA1109 | UNC79  | KMT2A  |       |
| APOB      | AHNAK2 | DNAH9   | RYR3    | PTPRQ    | DCHS1  | MAP1B  |       |
| RYR2      | NBEA   | SYNE2   | MUC2    | FBN2     | POLQ   | SACS   |       |
| ND5       | EYS    | TCHH    | HERC2   | PREX2    | DNAH2  | DNAH17 |       |
| CSMD3     | CSMD1  | ZNF469  | DNAH10  | FMN2     | LAMA1  | COL6A6 |       |
| OBSCN     | AXIN1  | HSPG2   | MUC17   | CSMD2    | PREX1  | HECTD4 |       |
| ABCA13    | RB1    | ZFHX4   | LRP1    | FASN     | NEB    | JAK1   |       |
| ARID1A    | DNAH7  | UNC80   | ANKRD12 | FAT2     | MYCBP2 | NCAM1  |       |
| CACNA1E   | ADGRV1 | COL11A1 | ABCA12  | COL6A3   | UNC13C | MYO18B |       |
| LRP1B     | CYTB   | BIRC6   | DCHS2   | COL12A1  | DSCAM  | ITPR1  |       |
| XIRP2     | ARID2  | KMT2B   | PRUNE2  | ATR      | SDK1   | ASCC3  |       |
| SPTA1     | DNAH6  | WDR87   | KMT2C   | SETD2    | PCDH15 | DST    |       |
| RYR1      | FAT3   | AHNAK   | DNAH8   | MDN1     | KIF26B | TENM4  |       |

---

**Table S2.** Classification of result confusion matrix of decision tree

| The true situation            | Prediction result          |                               | class precision<br>(specificity) | AMC data<br>validation<br>Accuracy |
|-------------------------------|----------------------------|-------------------------------|----------------------------------|------------------------------------|
|                               | Relapse within 6<br>months | More than 6 mouths<br>relapse |                                  |                                    |
| Relapse within 6<br>months    | <b>2</b>                   | <b>3</b>                      | 40.00%                           | 74.19%<br><br>( TCGA )             |
| More than 6 mouths<br>relapse | <b>5</b>                   | <b>21</b>                     | 80.77%                           |                                    |
| Class recall<br>(sensitivity) | 28.57%                     | 87.50%                        |                                  |                                    |
| Relapse within 6<br>months    | <b>1</b>                   | <b>27</b>                     | 3.57%                            | 70.41%<br><br>( AMC )              |
| More than 6 mouths<br>relapse | <b>2</b>                   | <b>68</b>                     | 97.14%                           |                                    |
| Class recall<br>(sensitivity) | 33.33%                     | 71.58%                        |                                  |                                    |

**Table S3.** Classification of result confusion matrix of SVM (accuracy: 80.65%)

| The true situation         | Prediction result       |                            | class precision (specificity) |
|----------------------------|-------------------------|----------------------------|-------------------------------|
|                            | Relapse within 6 months | More than 6 mouths relapse |                               |
| Relapse within 6 months    | <b>1</b>                | <b>0</b>                   | 100.00%                       |
| More than 6 mouths relapse | <b>6</b>                | <b>24</b>                  | 80.00%                        |
| class recall(sensitivity)  | 14.29%                  | 100.00%                    |                               |



**TableS4.**Conformance of the test model in 10 HCC patients

| Patient   | DFS   | NEB | ATR | FREM2 | TTN | ALB | XIRP2 | RYR1 | conformation |
|-----------|-------|-----|-----|-------|-----|-----|-------|------|--------------|
| Patient1  | 2.5m  | 0   | 0   | 0     | 0   | 0   | 1     | 0    | ✘            |
| Patient2  | 2.5m  | 1   | 0   | 0     | 1   | 0   | 0     | 1    | ✓            |
| Patient3  | 3.0m  | 0   | 0   | 0     | 1   | 0   | 0     | 0    | ✘            |
| Patient4  | >6.0m | 0   | 0   | 0     | 1   | 0   | 1     | 0    | ✓            |
| Patient5  | >6.0m | 0   | 0   | 0     | 1   | 1   | 0     | 0    | ✓            |
| Patient6  | 3.0m  | 1   | 0   | 1     | 0   | 0   | 0     | 1    | ✓            |
| Patient7  | >6.0m | 0   | 0   | 0     | 0   | 0   | 0     | 0    | ✓            |
| Patient8  | 3.0m  | 0   | 1   | 0     | 1   | 0   | 1     | 0    | ✓            |
| Patient9  | 5.0m  | 1   | 0   | 0     | 1   | 0   | 0     | 0    | ✓            |
| Patient10 | 5.0m  | 1   | 0   | 0     | 0   | 0   | 0     | 0    | ✓            |

("1" indicates that the gene is mutated)

**Table S5.** Histopathologic staging and liver cirrhosis grade of 10 HCC patients

| Patient   | Sex    | Age | DFS    | Peripheral hepatic steatosis grade | Inflammatory grade of peripheral liver tissue | Fibrosis grading | AJCC ( 7th ) | T   | N  | M  |
|-----------|--------|-----|--------|------------------------------------|-----------------------------------------------|------------------|--------------|-----|----|----|
| Patient1  | Male   | 62  | 2.5m   | F0                                 | G3                                            | S4               | IV           | T3b | N1 | M0 |
| Patient2  | Male   | 46  | 2.5m   | F0                                 | G2                                            | S3-4             | II           | T2  | N0 | M0 |
| Patient3  | Male   | 46  | 3.0m   | F0                                 | G3                                            | S3-4             | II           | T2  | N0 | M0 |
| Patient4  | Male   | 54  | > 6.0m | F1                                 | G2                                            | S2-3             | IIIB         | T3b | N0 | M0 |
| Patient5  | Male   | 49  | > 6.0m | F0                                 | G3                                            | S3-4             | IIIB         | T3b | N0 | M0 |
| Patient6  | Male   | 40  | 3.0m   | F0                                 | G3                                            | S3-4             | IIIC         | T4  | N0 | M0 |
| Patient7  | Male   | 47  | > 6.0m | F0                                 | G1                                            | S2-3             | IIIA         | T3a | N0 | M0 |
| Patient8  | Male   | 60  | 3.0m   | F0                                 | G2                                            | S3               | II           | T2  | N0 | M0 |
| Patient9  | Male   | 60  | 5.0m   | F0                                 | G3                                            | S3               | I            | T1  | N0 | M0 |
| Patient10 | Female | 39  | 5.0m   | F0                                 | G2                                            | S2               | II           | T2  | N0 | M0 |



**Table S7.** Gross and pathological features of the tumors in 10 HCC patients

| Patient   | Tumor number | Tumor Size     | Histological classification | Edmondson-Steiner grade | Portal vein and its main branches carcinoma thrombus | Intracholangial carcinoma thrombus | Nerve invasion | Micro vascular invasion (MVI) |
|-----------|--------------|----------------|-----------------------------|-------------------------|------------------------------------------------------|------------------------------------|----------------|-------------------------------|
| Patient1  | 1            | 4.0×3.7×3.5    | Solid and pseudoadenoid     | III                     | Yes                                                  | No                                 | No             | 1                             |
| Patient2  | 1            | 2.0×2.0×1.3    | Beam type                   | II-III                  | No                                                   | No                                 | No             | 1                             |
| Patient3  | 1            | 4.5×4.0×3.0    | Beam type                   | II-III                  | No                                                   | No                                 | No             | 1                             |
| Patient4  | 3            | 2.5×2.5×2.0    | Beam and pseudoadenoid      | II-III                  | Yes                                                  | Yes                                | No             | 1                             |
| Patient5  | 1            | 7.5×6.0×5.0    | Beam type                   | III                     | Yes                                                  | No                                 | No             | 2                             |
| Patient6  | 1            | 5.5×4.5×4.0    | Beam type                   | III                     | No                                                   | No                                 | No             | 1                             |
| Patient7  | 3            | 16.0×14.0×11.5 | Beam type                   | II                      | No                                                   | No                                 | No             | 0                             |
| Patient8  | 1            | 2.3×1.8×1.3    | Beam and pseudoadenoid      | II-III                  | No                                                   | No                                 | No             | 1                             |
| Patient9  | 1            | 15.0×13.0×11.0 | Beam type                   | II                      | No                                                   | No                                 | No             | 0                             |
| Patient10 | 3            | 3.0×3.0×4.0    | Beam type                   | II-III                  | No                                                   | No                                 | No             | 0                             |
